# Supplementary material for: Comparative genome-wide methylation analysis reveals epigenetic regulation of muscle development in grass carp (Ctenopharyngodon idellus) fed with whole faba bean
Source: PeerJ journal article supplement (doi:10.7717/peerj.14403), 2022-11-21
Supplement: Supplementary_file_1.pdf [file Supplementary_file_1.pdf]

# DNA Extraction SOP For Animal Tissue

Document NO.: SOP-SMM-J001

---

Version NO.: A0

---

Effective Date: 2016-4-15

---

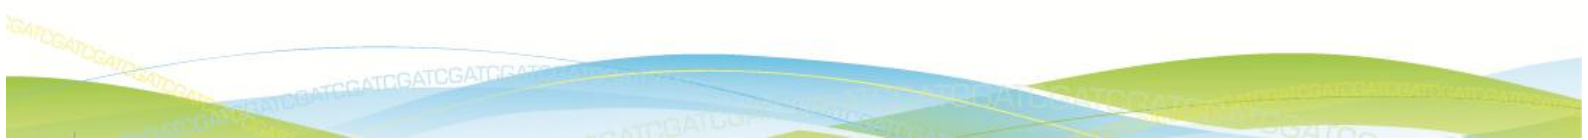

## 1 Introduction

A phenol-chloroform extraction is a liquid-liquid extraction. A liquid-liquid extraction is a method that separates mixtures of molecules based on the differential solubilities of the individual molecules in two different immiscible liquids. Liquid-liquid extractions are widely used to isolate DNA.

## 2 Experimental Procedures

- A. Pour 1ml lysis buffer.
- B. For tissue samples, grind about 200mg with liquid nitrogen into powder and transfer the powder samples into the 2 ml tube contain of 1ml lysis buffer.
- C. Incubate the sample at 56 °C in a water incubator for 30~180min. Mix by inversion every 5-10min time period.
- D. Centrifuge at 16700×g for 10 minutes after cooling to room temperature.
- E. Transfer the supernatant to a new 2.0ml tube, add equal volume of supernatant of Chloroform / isoamyl alcohol(24:1). Gently invert each 3-5min to mixed liquid no obvious boundaries.
- F. Transfer the aqueous phase to a new 1.5mL tube; add equal volume of supernatant of isopropyl alcohol. Gently invert each 3-5min to mixed liquid no obvious boundaries.
- G. Centrifuge at 16700×g for 10 minutes.
- H. Transfer the aqueous phase to a new 1.5mL tube; add 2/3th volume of supernatant of isopropyl alcohol (add 1/10<sup>th</sup> volume of 3M sodium acetate if necessary). Gently mix by inverting at least 3 times and place at -20 °C for 2 hours for precipitation.
- I. Centrifuge at 16700×g for 10 minutes and remove the supernatant
- J. Wash the RNA pellet with 1 ml 75% cooling ethanol. Re-suspend the pellet and centrifuge at 16700×g for 5 minutes at 4 °C and remove the supernatant
- K. Wash the RNA pellet with 500ul 75% cooling ethanol. Re-suspend the pellet and centrifuge at 16700×g for 5 minutes at 4 °C and remove the supernatant.
- L. 16700×g for 30~60s, Completely remove the ethanol without disturbing the pellet
- M. Air-dry the RNA pellet in the biosafety cabinet
- N. Add 25 µL~100 µL of TE Buffer to dissolve the DNA pellet. If a higher concentration of DNA is desired, 25 µL of TE Buffer should be used.

## Appendix 1 the list of Reagents and Materials

### 1-1 Reagents

| Reagent Name         | Model           | Manufacture |
|----------------------|-----------------|-------------|
| Proteinase K         | GPK003001-100mg | GPROAN      |
| Absolute Ethanol     | AR 500mL        | Sinopharm   |
| RNase A              | 10mg            | FERMENTAS   |
| Guanidinium chloride | GB0242-500g     | BBI         |
| SDS                  | SS0228-1kg      | BBI         |

## Appendix 2 the list of Equipment

| Equipment Name                | Model               | Manufacture |
|-------------------------------|---------------------|-------------|
| Thermomixer comfort           | Thermomixer comfort | Eppendorf   |
| Digital thermostat water bath | HH-8                | Jingda      |
| Centrifuge                    | 5427R               | Eppendorf   |
| Biological safety cabinets    | Airstream           | ESCO        |

-----END-----
